# Supplementary material
Source: PubMed Central journal article supplement (PMC6693117)
Supplement: Supplemental_material.pdf [file Supplemental_material.pdf]

## Appendix/Supplementary Material

---

### Criteria used to identify and stratify ICU patients into three risk categories for alcohol use and related physiological and psychological effects

| Alcohol Risk Cohort  | FAST Score Criteria | Criteria (Based on WHO & SIGN Guidelines)                                                                                                                                                                                                                                                                                                                                                                                                                                                                                                                                                                                                                                                                                                                                                                                                                                                                                                                                                                                                     |
|----------------------|---------------------|-----------------------------------------------------------------------------------------------------------------------------------------------------------------------------------------------------------------------------------------------------------------------------------------------------------------------------------------------------------------------------------------------------------------------------------------------------------------------------------------------------------------------------------------------------------------------------------------------------------------------------------------------------------------------------------------------------------------------------------------------------------------------------------------------------------------------------------------------------------------------------------------------------------------------------------------------------------------------------------------------------------------------------------------------|
| No Risk/<br>Low Risk | 0-2                 | <ul style="list-style-type: none"> <li>Consume no alcohol</li> <li>Have experienced no or minimal harm as a result of alcohol use.</li> </ul>                                                                                                                                                                                                                                                                                                                                                                                                                                                                                                                                                                                                                                                                                                                                                                                                                                                                                                 |
| At Risk              | 3-8                 | <ul style="list-style-type: none"> <li>Alcohol is responsible for or has substantially contributed to physical or psychological harm, including impaired judgement or dysfunctional behaviour</li> <li>The nature of harm is clearly identifiable (i.e. falls/ absence from work)</li> <li>The pattern has persisted for at least one month previous to admission or has occurred repeatedly within a 12 month period.</li> </ul>                                                                                                                                                                                                                                                                                                                                                                                                                                                                                                                                                                                                             |
| Alcohol-dependence   | 9-16                | <p>At least 3 of the following present:</p> <ul style="list-style-type: none"> <li>A strong desire or sense of compulsion to take alcohol</li> <li>Difficulty in controlling drinking in terms of: onset, termination or level of use</li> <li>A physiological <i>withdrawal</i> state is present when drinking has ceased or been reduced</li> <li>Drinking to relieve or avoid withdrawal symptoms</li> <li>Evidence of <i>tolerance</i>, such that increased doses of alcohol are required in order to achieve effects originally produced by lower amounts (examples are when individuals take daily doses sufficient to incapacitate or severely hurt non-tolerant users)</li> <li>Preoccupation with alcohol use to the detriment of other interests (e.g. social or occupational)</li> <li>Persistent alcohol use despite awareness of harmful consequences, such as physical harm (liver impairment), depressive mood states consequent to periods of heavy drinking, or alcohol related impairment of cognitive function.</li> </ul> |

---

## Stratification & matching strategy

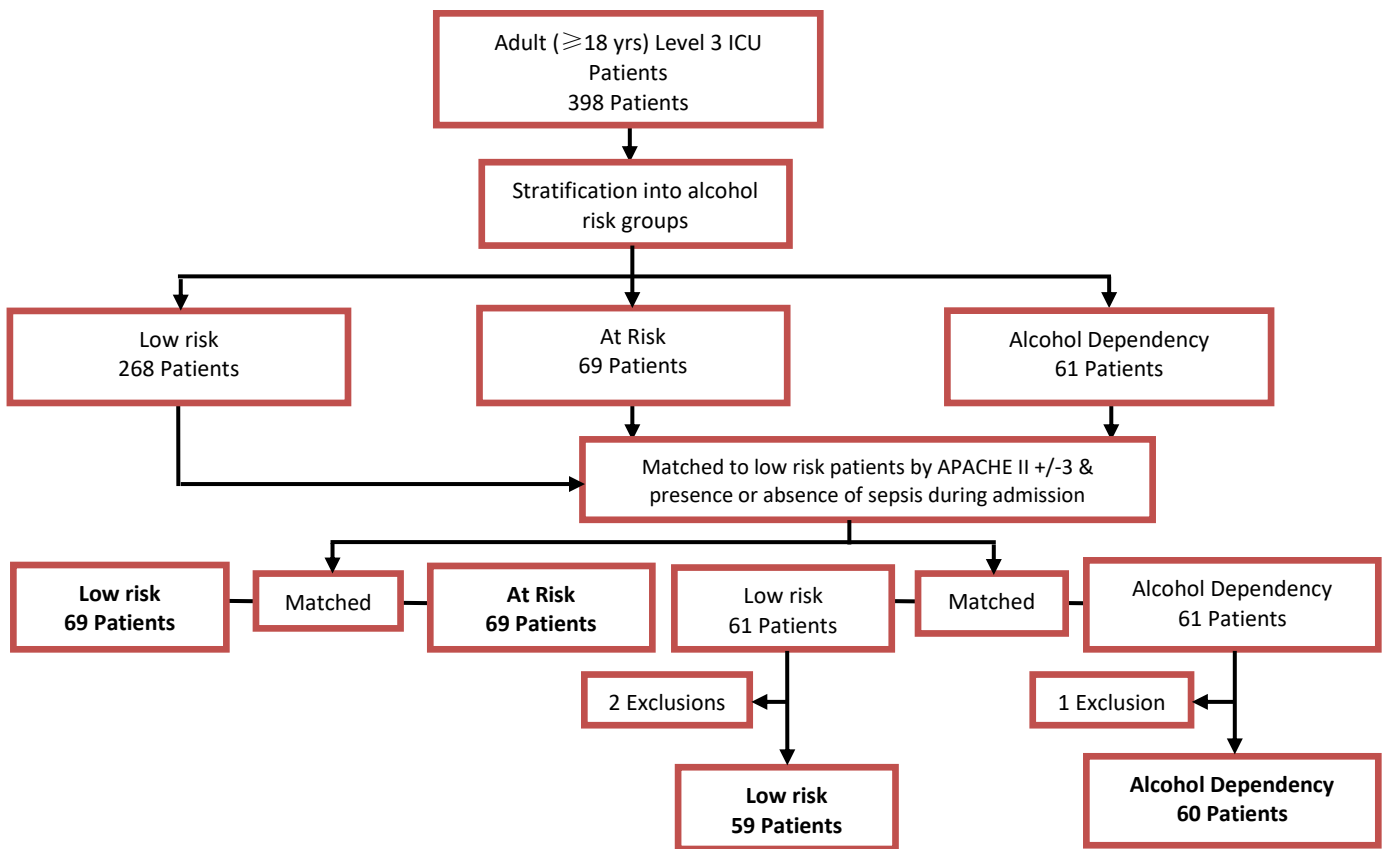

---

**Bloomsbury Sedation Scale**

| <b>Score</b> | <b>Term</b>               |
|--------------|---------------------------|
| 3            | Agitated & restless       |
| 2            | Awake but uncomfortable   |
| 1            | Awake but calm            |
| 0            | Roused by voice           |
| -1           | Roused by touch           |
| -2           | Roused by painful stimuli |
| -3           | Unroutable                |
| S            | Natural sleep             |
| P            | Paralysed                 |

---

**Predictive factors related to delirium in 60 alcohol-dependent patients admitted to ICU determined by univariate & multivariate analysis.**

| Factor                                     | Delirium<br>(n=41)     | No Delirium<br>(n=19) | Univariate          |        | Multivariate      |       |
|--------------------------------------------|------------------------|-----------------------|---------------------|--------|-------------------|-------|
|                                            | Median (IQR) or n (%)  |                       | Odds Ratio (CI)     | p      | Odds Ratio (CI)   | p     |
| Age (in years)                             | 49 (40-57)             | 45 (41-58)            | 1.02 (0.97-1.08)    | 0.491  |                   |       |
| Sex (male)                                 | 27 (65.9%)             | 15 (78.9%)            | 2.15 (0.60-7.70)    | 0.238  |                   |       |
| Liver disease                              | 26 (63.4%)             | 10 (52.6%)            | 1.00 (0.33-2.99)    | 1.00   |                   |       |
| Morphine equivalents<br>(cumulative dose)  | 381.3<br>(66.7-2627.1) | 40<br>(0-210)         | 1.002 (1.00-1.003)  | 0.041  |                   |       |
| Lorazepam equivalents<br>(cumulative dose) | 2.5<br>(0-19.1)        | 0<br>(0-0)            | 1.21<br>(0.99-1.47) | 0.053  |                   |       |
| ICU LOS                                    | 13 (6-21.5)            | 2 (2-7)               | 1.18 (1.06-1.31)    | 0.002  | 1.13 (1.00-1.27)  | 0.043 |
| Sepsis                                     | 26 (63.4%)             | 3 (15.8%)             | 18.6 (3.8-92.9)     | 0.0001 | 5.07 (1.12-23.01) | 0.036 |
| No. sedative drugs                         | 4 (4-6)                | 4 (2-4)               | 1.60 (1.15-2.22)    | 0.005  | 1.22 (0.82-1.80)  | 0.328 |

*LOS: Length of stay; Morphine equivalents include morphine, fentanyl, alfentanil & methadone; Lorazepam equivalents include lorazepam, midazolam, diazepam & temazepam.*
